# Supplementary material for: Assessment of Risk Factors in Synanthropic and Wild Rodents Infected by Pathogenic Leptospira spp. Captured in Southern Chile
Source: MDPI journal article supplement (doi:10.3390/ani10112133), 2020-11-17
Supplement: s1 [file s1]

**Table S1.** Histological findings related to infection status in rodents trapped in dairy farms at Los Ríos region, Chile.

| Organ  | Lesion                                | Infected (%) | No infected (%) |
|--------|---------------------------------------|--------------|-----------------|
| Kidney | Interstitial nephritis                | 74.0         | 50.0            |
|        | Hemorrhage                            | 36.4         | 31.8            |
|        | Hemorrhage                            | 68.8         | 61.4            |
| Lung   | Congestion                            | 31.2         | 40.9            |
|        | Inflammatory mononuclear infiltration | 49.4         | 45.5            |
|        | Inflammatory mononuclear infiltration | 45.5         | 29.5            |
| Liver  | Hemorrhage                            | 9.1          | 18.2            |
|        | Congestion                            | 9.1          | 9.1             |
|        | Necrosis                              | 28.6         | 45.5            |
| Heart  | Inflammatory mononuclear infiltration | 29.9         | 18.2            |

**Publisher's Note:** MDPI stays neutral with regard to jurisdictional claims in published maps and institutional affiliations.

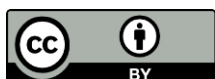

© 2020 by the authors. Licensee MDPI, Basel, Switzerland. This article is an open access article distributed under the terms and conditions of the Creative Commons Attribution (CC BY) license (<http://creativecommons.org/licenses/by/4.0/>).
